# Supplementary material for: High Tg/HDL-Cholesterol Ratio Highlights a Higher Risk of Metabolic Syndrome in Children and Adolescents with Severe Obesity
Source: MDPI journal article supplement (doi:10.3390/jcm11154488), 2022-08-01
Supplement: s1 [file s1]

Supplementary Table S1: ROC Contrast Estimation and Testing Results by Row among BMI, BMI-SDS, TMI, WtHR, TG HDL, CMI, VAI.

| Contrast      | Estimate | Standard | 95% Wald          |        | Chi-Square | Pr > ChiSq |
|---------------|----------|----------|-------------------|--------|------------|------------|
|               |          | Error    | Confidence Limits |        |            |            |
| WtHR - VAI    | -0.293   | 0.030    | -0.352            | -0.234 | 93.883     | <0.0001    |
| TMI - VAI     | -0.301   | 0.032    | -0.363            | -0.240 | 91.716     | <0.0001    |
| TG/HDL - VAI  | -0.004   | 0.0031   | -0.010            | 0.002  | 1.423      | 0.2329     |
| CMI - VAI     | -0.007   | 0.005    | -0.016            | 0.002  | 2.546      | 0.1106     |
| BMI - VAI     | -0.222   | 0.030    | -0.281            | -0.163 | 54.002     | <0.0001    |
| BMI SDS - VAI | -0.279   | 0.031    | -0.340            | -0.218 | 80.454     | <0.0001    |

| Contrast         | Estimate | Standard | 95% Wald          |        | Chi-Square | Pr > ChiSq |
|------------------|----------|----------|-------------------|--------|------------|------------|
|                  |          | Error    | Confidence Limits |        |            |            |
| VAI – TG/HDL     | 0.004    | 0.003    | -0.002            | 0.010  | 1.423      | 0.2329     |
| WtHR – TG/HDL    | -0.289   | 0.031    | -0.350            | -0.228 | 86.853     | <0.0001    |
| TMI – TG/HDL     | -0.298   | 0.031    | -0.359            | -0.237 | 91.37      | <0.0001    |
| CMI – TG/HDL     | -0.004   | 0.005    | -0.013            | 0.006  | 0.564      | 0.4525     |
| BMI – TG/HDL     | -0.218   | 0.030    | -0.278            | -0.159 | 52.155     | <0.0001    |
| BMI SDS – TG/HDL | -0.275   | 0.031    | -0.335            | -0.214 | 79.271     | <0.0001    |

| Contrast      | Estimate | Standard | 95% Wald          |        | Chi-Square | Pr > ChiSq |
|---------------|----------|----------|-------------------|--------|------------|------------|
|               |          | Error    | Confidence Limits |        |            |            |
| VAI - CMI     | 0.007    | 0.005    | -0.002            | 0.016  | 2.546      | 0.1106     |
| WtHR - CMI    | -0.285   | 0.028    | -0.340            | -0.231 | 103.979    | <0.0001    |
| TMI - CMI     | -0.294   | 0.029    | -0.351            | -0.238 | 103.97     | <0.0001    |
| TG/HDL - CMI  | 0.004    | 0.005    | -0.006            | 0.013  | 0.564      | 0.4525     |
| BMI - CMI     | -0.215   | 0.028    | -0.270            | -0.159 | 57.417     | <0.0001    |
| BMI SDS - CMI | -0.271   | 0.029    | -0.328            | -0.215 | 89.381     | <0.0001    |

Abbreviations: BMI: Body Mass Index; BMI SDS: BMI standard deviation score; TMI: Tri-Ponderal Mass Index; WtHR: Waist-to-Height ratio; TG/HDL: triglyceride to high density-lipoprotein cholesterol ratio; CMI: Cardiometabolic Index; VAI: Visceral Adiposity Index.
